# Supplementary material for: Oxygen isotopes suggest elevated thermometabolism within multiple Permo-Triassic therapsid clades
Source: eLife. 2017 Jul 18;6:e28589. doi: 10.7554/eLife.28589 (PMC5515572; doi:10.7554/eLife.28589)
Supplement: Supplementary file 1. — Asterisks represent diagenetically altered values. DOI: http://dx.doi.org/10.7554/eLife.28589.008 [file elife-28589-supp1.xlsx]

## Sheet: Feuil1
Sample	Collection	Material	Taxon	Lineage	Country	Lithostratigraphy	Complementary	Locality	Age (Ma)	Paleolatitude (°)	δ18Op	δ18Oc		CO3	Data
	Number						Informations				(‰, V-SMOW)	(‰, V-SMOW)		(Wt %)	Source
C9	not numbered	Tooth	Sinophoneus yumenensis	Therapsida	China	Qingtoushan Fm.	Gansu Province	Dashankou	270.6±1.8	19.3±2.7	10.9136	18.2367		2.48496	This study
C10	not numbered	Tooth	Belebey chengi	Parareptilia	China	Qingtoushan Fm.	Gansu Province	Dashankou	270.6±1.8	19.3±2.7	15.3107	19.184		3.33268	This study
C11	not numbered	Tooth	Shansiodon wangi	Therapsida	China	Ermaying Fm.	Shanxi Province	Yinjiao, Yushe	244.6±2.6	17.4±5.4	9.92037	16.8436		2.36122	This study
C19	IVPP V 981	Tooth	Parakannemeyeria youngi	Therapsida	China	Ermaying Fm.	Shanxi Province	Louzeyu, Wuxiang	244.6±2.6	17.4±5.4	10.2568	17.6412		1.48561	This study
C16	IVPP V 2513A	Tooth	Shansisuchus shansisuchus	Archosauriformes	China	Ermaying Fm.	Shanxi Province	Wuxiang	244.6±2.6	17.4±5.4	12.0258	20.9071		4.64662	This study
C17	IVPP V 2513A	Tooth	Shansisuchus shansisuchus	Archosauriformes	China	Ermaying Fm.	Shanxi Province	Wuxiang	244.6±2.6	17.4±5.4	12.34	19.3091		2.64198	This study
C18	IVPP V 2513A	Tooth	Shansisuchus shansisuchus	Archosauriformes	China	Ermaying Fm.	Shanxi Province	Wuxiang	244.6±2.6	17.4±5.4	11.4362	18.7966		2.02909	This study
C2	not numbered	Tooth	Lystrosauridae	Therapsida	China	Jiucaiyuan Fm.	Xinjiang Province	Taoshuyuan, Turfan	251.6±0.4	40.9±14.6	11.3622	17.1066		1.96628	This study
C3	IVPP RV 36315	Tooth	Chasmatosaurus yuani	Archosauriformes	China	Jiucaiyuan Fm.	Xinjiang Province	Jimsar	251.6±0.4	41.5±14.6	11.4344	20.5625		6.01427	This study
M1	MNHN-ALM35	Bone	Moghreberia nmachouensis	Therapsida	Morocco	Timezgadiouine Fm.	Argana Basin	XI, T5	231.5±2.3	6.7±6.3	20.89	28.3662		6.97952	This study
M2	MNHN-ALM132	Bone	Moghreberia nmachouensis	Therapsida	Morocco	Timezgadiouine Fm.	Argana Basin	XI, T5	231.5±2.3	6.7±6.3	20.98	25.1745		2.94627	This study
M3	MNHN-ALM159	Bone	Moghreberia nmachouensis	Therapsida	Morocco	Timezgadiouine Fm.	Argana Basin	XI, T5	231.5±2.3	6.7±6.3	20.03	27.953		3.94573	This study
M4	MNHN-ALM73-2	Bone	Almasaurus habbazi	Stereospondyli	Morocco	Timezgadiouine Fm.	Argana Basin	XI, T5	231.5±2.3	6.7±6.3	18.3	24.9623		4.66371	This study
M5	MNHN-not numbered	Bone	Almasaurus habbazi	Stereospondyli	Morocco	Timezgadiouine Fm.	Argana Basin	XI, T5	231.5±2.3	6.7±6.3	18.33	24.0866		2.83852	This study
M6	MNHN-ALM72	Bone	Almasaurus habbazi	Stereospondyli	Morocco	Timezgadiouine Fm.	Argana Basin	XI, T5	231.5±2.3	6.7±6.3	18.76	24.2664		2.96288	This study
M8	MNHN-ALM146-2	Bone	Moghreberia nmachouensis	Therapsida	Morocco	Timezgadiouine Fm.	Argana Basin	XI, T5	231.5±2.3	6.7±6.3	20.28	26.0775		8.8175	This study
M9	MNHN-ALM96	Bone	Moghreberia nmachouensis	Therapsida	Morocco	Timezgadiouine Fm.	Argana Basin	XI, T5	231.5±2.3	6.7±6.3	20.06	25.8818		9.08723	This study
L2	not numbered	Bone	Basal Sauropodomorpha	Archosauriformes	Lesotho	Elliot Fm.	Stormberg Group	Pokane	203.1±1.8	-44.1±0.7	12.23	17.5158		4.31984	This study
L14	not numbered	Tooth	Eucynodontia	Therapsida	Lesotho	Elliot Fm.	Stormberg Group	Pokane	203.1±1.8	-44.1±0.7	14.31	20.1919		3.20115	This study
SA35	BP/I/5534	Bone	Kannemeyeria	Therapsida	South Africa	Burgersdorp Fm.	Cynognathus C AZ	Wilgerkloof	243.3±1.3	-61.3±1.2	4.54	11.3025		2.45571	Rey et al. 2016
SA36	BP/I/5541	Tooth	Diademodon	Therapsida	South Africa	Burgersdorp Fm.	Cynognathus C AZ	Wilgerkloof	243.3±1.3	-61.3±1.2	1.86	11.7083		2.71518	Rey et al. 2016
SA37	BP/I/5541	Bone	Diademodon	Therapsida	South Africa	Burgersdorp Fm.	Cynognathus C AZ	Wilgerkloof	243.3±1.3	-61.3±1.2	3.01	11.4007		2.25933	Rey et al. 2016
SA38	BP/I/5550	Bone	Xenotosuchus	Stereospondyli	South Africa	Burgersdorp Fm.	Cynognathus C AZ	Wilgerkloof	243.3±1.3	-61.3±1.2	4.99	11.2251		4.2193	Rey et al. 2016
SA39	BP/I/5552	Bone	Paracyclotosaurus	Stereospondyli	South Africa	Burgersdorp Fm.	Cynognathus C AZ	Wilgerkloof	243.3±1.3	-61.3±1.2	4.94	10.7333		4.47118	Rey et al. 2016
SA40	BP/I/6282	Bone	Paracyclotosaurus	Stereospondyli	South Africa	Burgersdorp Fm.	Cynognathus C AZ	Wilgerkloof	243.3±1.3	-61.3±1.2	7.66	12.0425		5.36796	Rey et al. 2016
SA43	BP/I/6094	Bone	Xenotosuchus	Stereospondyli	South Africa	Burgersdorp Fm.	Cynognathus B AZ	Bethel	245.9±1.3	-58.2±2.8	10.75	17.3204	*	33.4258	Rey et al. 2016
SA44	BP/I/4651	Bone	Xenotosuchus	Stereospondyli	South Africa	Burgersdorp Fm.	Cynognathus B AZ	Bethel	245.9±1.3	-58.2±2.8	11.02	14.4104		6.23007	Rey et al. 2016
SA45	BP/I/4651	Tooth	Xenotosuchus	Stereospondyli	South Africa	Burgersdorp Fm.	Cynognathus B AZ	Bethel	245.9±1.3	-58.2±2.8	11.57	14.9048		7.57706	Rey et al. 2016
SA47	BP/I/4653	Tooth	Microposaurus	Stereospondyli	South Africa	Burgersdorp Fm.	Cynognathus B AZ	Bethel	245.9±1.3	-58.2±2.8	11.35	17.0842	*	24.1925	Rey et al. 2016
SA48	BP/I/4653	Bone	Microposaurus	Stereospondyli	South Africa	Burgersdorp Fm.	Cynognathus B AZ	Bethel	245.9±1.3	-58.2±2.8	11.31	17.2308	*	24.1716	Rey et al. 2016
SA41	BP/I/4526	Tooth	Erythrosuchus	Archosauriformes	South Africa	Burgersdorp Fm.	Cynognathus B AZ	Bethel	245.9±1.3	-58.2±2.8	9.54	15.3996		5.70882	Rey et al. 2016
SA42	BP/I/4526	Bone	Erythrosuchus	Archosauriformes	South Africa	Burgersdorp Fm.	Cynognathus B AZ	Bethel	245.9±1.3	-58.2±2.8	9.64	14.4865		4.97993	Rey et al. 2016
SA49	BP/I/6557	Bone	Erythrosuchus	Archosauriformes	South Africa	Burgersdorp Fm.	Cynognathus B AZ	Bethel	245.9±1.3	-58.2±2.8	11.31	16.1197		7.61515	Rey et al. 2016
SA51	BP/I/4645	Tooth	Erythrosuchus	Archosauriformes	South Africa	Burgersdorp Fm.	Cynognathus B AZ	Bethel	245.9±1.3	-58.2±2.8	8.72	13.6986		4.87177	Rey et al. 2016
SA52	BP/I/4645	Bone	Erythrosuchus	Archosauriformes	South Africa	Burgersdorp Fm.	Cynognathus B AZ	Bethel	245.9±1.3	-58.2±2.8	8.46	13.9206		6.62506	Rey et al. 2016
SA53	BP/I/4542	Tooth	Cynognathus	Therapsida	South Africa	Burgersdorp Fm.	Cynognathus B AZ	Bethel	245.9±1.3	-58.2±2.8	10.82	16.2585		7.72199	Rey et al. 2016
SA54	BP/I/4542	Bone	Cynognathus	Therapsida	South Africa	Burgersdorp Fm.	Cynognathus B AZ	Bethel	245.9±1.3	-58.2±2.8	9.82	20.3145	*	29.9119	Rey et al. 2016
SA55	BP/I/4654	Bone	Cynognathus	Therapsida	South Africa	Burgersdorp Fm.	Cynognathus B AZ	Bethel	245.9±1.3	-58.2±2.8	10.09	15.5549		7.69296	Rey et al. 2016
SA56	BP/I/4654	Tooth	Cynognathus	Therapsida	South Africa	Burgersdorp Fm.	Cynognathus B AZ	Bethel	245.9±1.3	-58.2±2.8	11.28	16.06		7.79252	Rey et al. 2016
SA57	BP/I/4545	Tooth	Kannemeyeria	Therapsida	South Africa	Burgersdorp Fm.	Cynognathus B AZ	Bethel	245.9±1.3	-58.2±2.8	10.14	14.0935		8.66958	Rey et al. 2016
SA58	BP/I/4545	Bone	Kannemeyeria	Therapsida	South Africa	Burgersdorp Fm.	Cynognathus B AZ	Bethel	245.9±1.3	-58.2±2.8	10.56	19.8871	*	17.4133	Rey et al. 2016
SA61	BP/I/4648	Tooth	Kannemeyeria	Therapsida	South Africa	Burgersdorp Fm.	Cynognathus B AZ	Bethel	245.9±1.3	-58.2±2.8	12.24	14.8467		7.59444	Rey et al. 2016
SA62	BP/I/4648	Bone	Kannemeyeria	Therapsida	South Africa	Burgersdorp Fm.	Cynognathus B AZ	Bethel	245.9±1.3	-58.2±2.8	12.31	14.3975		13.1194	Rey et al. 2016
SA63	BP/I/4529	Bone	Diademodon	Therapsida	South Africa	Burgersdorp Fm.	Cynognathus B AZ	Bethel	245.9±1.3	-58.2±2.8	10.9	15.2549		8.18427	Rey et al. 2016
SA64	BP/I/4549	Bone	Diademodon	Therapsida	South Africa	Burgersdorp Fm.	Cynognathus B AZ	Bethel	245.9±1.3	-58.2±2.8	9.17	16.5619	*	16.7157	Rey et al. 2016
SA65	BP/I/4652	Tooth	Diademodon	Therapsida	South Africa	Burgersdorp Fm.	Cynognathus B AZ	Bethel	245.9±1.3	-58.2±2.8	10.63	15.9187		7.73375	Rey et al. 2016
SA66	BP/I/4647	Bone	Diademodon	Therapsida	South Africa	Burgersdorp Fm.	Cynognathus B AZ	Bethel	245.9±1.3	-58.2±2.8	9.51	14.389		6.93388	Rey et al. 2016
SA67	BP/I/4555	Bone	Kannemeyeria	Therapsida	South Africa	Burgersdorp Fm.	Cynognathus B AZ	Bethel	245.9±1.3	-58.2±2.8	12.39	15.1074		6.65187	Rey et al. 2016
SA124	BP/I/1675	Tooth	Diademodon	Therapsida	South Africa	Burgersdorp Fm.	Cynognathus B AZ	Nooitgedacht	245.9±1.3	-58.1±2.8	10.27	14.2637		7.37067	Rey et al. 2016
SA125	BP/I/1675	Tooth	Diademodon	Therapsida	South Africa	Burgersdorp Fm.	Cynognathus B AZ	Nooitgedacht	245.9±1.3	-58.1±2.8	8.75	14.1948		7.18905	Rey et al. 2016
SA126	BP/I/1675	Tooth	Cynognathus	Therapsida	South Africa	Burgersdorp Fm.	Cynognathus B AZ	Nooitgedacht	245.9±1.3	-58.1±2.8	9.89	14.2458		7.12291	Rey et al. 2016
SA127	BP/I/1675	Tooth	Cynognathus	Therapsida	South Africa	Burgersdorp Fm.	Cynognathus B AZ	Nooitgedacht	245.9±1.3	-58.1±2.8	10.13	14.2064		7.3885	Rey et al. 2016
SA128	BP/I/1675	Tooth	Cynognathus	Therapsida	South Africa	Burgersdorp Fm.	Cynognathus B AZ	Nooitgedacht	245.9±1.3	-58.1±2.8	9.45	13.6166		7.0908	Rey et al. 2016
SA46	BP/I/5656	Bone	Xenotosuchus	Stereospondyli	South Africa	Burgersdorp Fm.	Cynognathus B AZ	Slootkraal	245.9±1.3	-58.2±2.8	9.95	14.149		7.07058	Rey et al. 2016
SA59	BP/I/6567	Tooth	Kannemeyeria	Therapsida	South Africa	Burgersdorp Fm.	Cynognathus B AZ	Slootkraal	245.9±1.3	-58.2±2.8	11.66	15.9413		5.74201	Rey et al. 2016
SA60	BP/I/6524	Tooth	Kannemeyeria	Therapsida	South Africa	Burgersdorp Fm.	Cynognathus B AZ	Slootkraal	245.9±1.3	-58.2±2.8	11.26	14.3599		7.52714	Rey et al. 2016
SA82	BP/I/3876	Bone	Lydekkerina	Stereospondyli	South Africa	Harrismith M.	Lower Lystrosaurus AZ	Harrismith	251.6±0.4	-58.7±2.8	11.56	19.7083	*	37.8862	Rey et al. 2016
SA83	BP/I/4270	Bone	Lydekkerina	Stereospondyli	South Africa	Harrismith M.	Lower Lystrosaurus AZ	Harrismith	251.6±0.4	-58.7±2.8	9.97	16.808	*	38.0954	Rey et al. 2016
SA84	BP/I/2694	Bone	Lydekkerina	Stereospondyli	South Africa	Harrismith M.	Lower Lystrosaurus AZ	Harrismith	251.6±0.4	-58.7±2.8	10.69	19.2345	*	32.7532	Rey et al. 2016
SA85	BP/I/3878	Bone	Lydekkerina	Stereospondyli	South Africa	Harrismith M.	Lower Lystrosaurus AZ	Harrismith	251.6±0.4	-58.7±2.8	10.49	18.7285	*	24.277	Rey et al. 2016
SA86	BP/I/1383	Bone	Lystrosaurus	Therapsida	South Africa	Harrismith M.	Lower Lystrosaurus AZ	Harrismith	251.6±0.4	-58.7±2.8	12.88	19.0961	*	21.7615	Rey et al. 2016
SA87	BP/I/2032	Tooth	Lystrosaurus	Therapsida	South Africa	Harrismith M.	Lower Lystrosaurus AZ	Harrismith	251.6±0.4	-58.7±2.8	11.34	17.4491		6.38282	Rey et al. 2016
SA88	BP/I/1379	Tooth	Lystrosaurus	Therapsida	South Africa	Harrismith M.	Lower Lystrosaurus AZ	Harrismith	251.6±0.4	-58.7±2.8	10.69	18.1462		8.52374	Rey et al. 2016
SA89	BP/I/1379	Bone	Lystrosaurus	Therapsida	South Africa	Harrismith M.	Lower Lystrosaurus AZ	Harrismith	251.6±0.4	-58.7±2.8	11.1	15.7795	*	25.5367	Rey et al. 2016
SA90	BP/I/4006	Tooth	Lystrosaurus	Therapsida	South Africa	Harrismith M.	Lower Lystrosaurus AZ	Harrismith	251.6±0.4	-58.7±2.8	10.79	17.6755		5.60884	Rey et al. 2016
SA91	BP/I/4310	Tooth	Lystrosaurus	Therapsida	South Africa	Harrismith M.	Lower Lystrosaurus AZ	Harrismith	251.6±0.4	-58.7±2.8	10.74	15.6029		5.56465	Rey et al. 2016
SA92	BP/I/4483	Tooth	Dicynodon	Therapsida	South Africa	-	Lower Daptocephalus AZ	Klipfontein	254.4±0.8	-57.3±2.8	7.74	11.4523		2.7855	Rey et al. 2016
SA93	BP/I/4483	Bone	Dicynodon	Therapsida	South Africa	-	Lower Daptocephalus AZ	Klipfontein	254.4±0.8	-57.3±2.8	7.91	19.7652	*	22.1198	Rey et al. 2016
SA94	BP/I/4565	Bone	Oudenodon	Therapsida	South Africa	-	Lower Daptocephalus AZ	Klipfontein	254.4±0.8	-57.3±2.8	9.3	13.3723		6.66724	Rey et al. 2016
SA95	BP/I/4564	Bone	Pareiasaurus	Parareptilia	South Africa	-	Lower Daptocephalus AZ	Klipfontein	254.4±0.8	-57.3±2.8	2.56	9.99731		3.2625	Rey et al. 2016
SA96	BP/I/4473	Bone	Rhinesuchus	Stereospondyli	South Africa	-	Lower Daptocephalus AZ	Klipfontein	254.4±0.8	-57.3±2.8	1.31	14.2445		9.60469	Rey et al. 2016
SA97	BP/I/4489	Bone	Pareiasaurus	Parareptilia	South Africa	-	Lower Daptocephalus AZ	Klipfontein	254.4±0.8	-57.3±2.8	2.43	8.55232		3.67637	Rey et al. 2016
SA132	PV/GD08	Bone	Diictodon	Therapsida	South Africa	Daggaboersnek M.	Lower Daptocephalus AZ	Van Wyksfontein	254.4±0.8	-57.3±2.8	6.77	11.4594		0.362043	Rey et al. 2016
SA09	SAM-PK-K07741	Tooth	Rhinesuchid	Stereospondyli	South Africa	Hoedemaker M.	Tropidostoma AZ	Leeuw Kloof	257.7±0.9	-56.7±0.5	1.75	10.3722	*	0.884074	Rey et al. 2016
SA10	SAM-PK-K07741	Bone	Rhinesuchid	Stereospondyli	South Africa	Hoedemaker M.	Tropidostoma AZ	Leeuw Kloof	257.7±0.9	-56.7±0.5	2.4	12.0527		9.40858	Rey et al. 2016
SA04	SAM-PK-010678	Bone	Aelurosaurus	Therapsida	South Africa	Hoedemaker M.	Tropidostoma AZ	Leeuw Kloof	257.7±0.9	-56.7±0.5	3.17	15.8666	*	25.0329	Rey et al. 2016
SA01	SAM-PK-K07110	Tooth	Diictodon	Therapsida	South Africa	Hoedemaker M.	Tropidostoma AZ	Leeuw Kloof	257.7±0.9	-56.7±0.5	3.7	11.1605		2.05425	Rey et al. 2016
SA31	SAM-PK-K07108	Bone	Diictodon	Therapsida	South Africa	Hoedemaker M.	Tropidostoma AZ	Leeuw Kloof	257.7±0.9	-56.7±0.5	6.77	16.5553		3.32827	Rey et al. 2016
SA26	SAM-PK-K10586	Bone	Ictidosuchoides	Therapsida	South Africa	Hoedemaker M.	Tropidostoma AZ	Leeuw Kloof	257.7±0.9	-56.7±0.5	4.01	13.1486	*	21.6752	Rey et al. 2016
SA08	SAM-PK-K07742	Bone	Oudenodon	Therapsida	South Africa	Hoedemaker M.	Tropidostoma AZ	Leeuw Kloof	257.7±0.9	-56.7±0.5	3.46	12.8369	*	42.3476	Rey et al. 2016
SA11	SAM-PK-K10102	Bone	Oudenodon	Therapsida	South Africa	Hoedemaker M.	Tropidostoma AZ	Leeuw Kloof	257.7±0.9	-56.7±0.5	5.05	11.6222		5.92481	Rey et al. 2016
SA13	SAM-PK-K07133	Bone	Oudenodon	Therapsida	South Africa	Hoedemaker M.	Tropidostoma AZ	Leeuw Kloof	257.7±0.9	-56.7±0.5	4.67	10.1392		2.18237	Rey et al. 2016
SA03	SAM-PK-010676	Bone	Tropidostoma	Therapsida	South Africa	Hoedemaker M.	Tropidostoma AZ	Leeuw Kloof	257.7±0.9	-56.7±0.5	2.79	10.3075		1.70712	Rey et al. 2016
SA07	SAM-PK-010681	Bone	Tropidostoma	Therapsida	South Africa	Hoedemaker M.	Tropidostoma AZ	Leeuw Kloof	257.7±0.9	-56.7±0.5	3.33	11.2307		1.58045	Rey et al. 2016
SA25	SAM-PK-K10531	Bone	Tropidostoma	Therapsida	South Africa	Hoedemaker M.	Tropidostoma AZ	Leeuw Kloof	257.7±0.9	-56.7±0.5	3.31	11.2559		2.45189	Rey et al. 2016
SA16	SAM-PK-K05354	Tooth	Diictodon	Therapsida	South Africa	Hoedemaker M.	Tropidostoma AZ	Quagga fontein	257.7±0.9	-56.7±0.5	3.8	11.4531		2.67692	Rey et al. 2016
SA17	SAM-PK-K05326	Tooth	Diictodon	Therapsida	South Africa	Hoedemaker M.	Tropidostoma AZ	Quagga fontein	257.7±0.9	-56.7±0.5	3.94	9.43758		2.41291	Rey et al. 2016
SA19	SAM-PK-K05336	Tooth	Diictodon	Therapsida	South Africa	Hoedemaker M.	Tropidostoma AZ	Quagga fontein	257.7±0.9	-56.7±0.5	3.55	12.985		2.75237	Rey et al. 2016
SA20	SAM-PK-K05346	Bone	Diictodon	Therapsida	South Africa	Hoedemaker M.	Tropidostoma AZ	Quagga fontein	257.7±0.9	-56.7±0.5	4.41	15.4924		7.8077	Rey et al. 2016
SA22	SAM-PK-K05349	Tooth	Diictodon	Therapsida	South Africa	Hoedemaker M.	Tropidostoma AZ	Quagga fontein	257.7±0.9	-56.7±0.5	4.92	11.8963		2.84763	Rey et al. 2016
SA23	SAM-PK-K05349	Bone	Diictodon	Therapsida	South Africa	Hoedemaker M.	Tropidostoma AZ	Quagga fontein	257.7±0.9	-56.7±0.5	3.36	11.725		2.87944	Rey et al. 2016
SA34	SAM-PK-K05345	Tooth	Diictodon	Therapsida	South Africa	Hoedemaker M.	Tropidostoma AZ	Quagga fontein	257.7±0.9	-56.7±0.5	5.59	13.9197		11.2162	Rey et al. 2016
SA14	SAM-PK-K05344	Bone	Oudenodon	Therapsida	South Africa	Hoedemaker M.	Tropidostoma AZ	Quagga fontein	257.7±0.9	-56.7±0.5	4.75	15.0438		8.15497	Rey et al. 2016
SA27	SAM-PK-K05366	Bone	Oudenodon	Therapsida	South Africa	Hoedemaker M.	Tropidostoma AZ	Quagga fontein	257.7±0.9	-56.7±0.5	4.75	13.6381		3.30085	Rey et al. 2016
SA18	SAM-PK-K05339	Bone	Basal Cynodont	Therapsida	South Africa	Hoedemaker M.	Tropidostoma AZ	Quagga fontein	257.7±0.9	-56.7±0.5	4.13	13.5529		8.10297	Rey et al. 2016
SA06	SAM-PK-005615	Bone	Rhachiocephalus	Therapsida	South Africa	Hoedemaker M.	Tropidostoma AZ	Quagga fontein	257.7±0.9	-56.7±0.5	4.86	12.4664		2.8861	Rey et al. 2016
SA110	BP/I/2439	Bone	Rhachiocephalus	Therapsida	South Africa	Hoedemaker M.	Tropidostoma AZ	Quagga fontein	257.7±0.9	-56.7±0.5	5.48	10.8351		3.16952	Rey et al. 2016
SA115	BP/I/1578	Tooth	Pareiasauridae	Parareptilia	South Africa	Abrahamskraal Fm.	Lower Tapinocephalus AZ	Die Bad	263.9±1.2	-56.4±0.5	3.13	11.2813		3.37657	Rey et al. 2016
SA118	BP/I/1577	Bone	Pareiasauridae	Parareptilia	South Africa	Abrahamskraal Fm.	Lower Tapinocephalus AZ	Die Bad	263.9±1.2	-56.4±0.5	3.89	10.6589		3.43675	Rey et al. 2016
SA119	BP/I/1369	Bone	Anteosaurus	Therapsida	South Africa	Abrahamskraal Fm.	Lower Tapinocephalus AZ	Die Bad	263.9±1.2	-56.4±0.5	4.85	14.1067		1.71839	Rey et al. 2016
SA123	BP/I/1370	Bone	Anteosaurus	Therapsida	South Africa	Abrahamskraal Fm.	Lower Tapinocephalus AZ	Die Bad	263.9±1.2	-56.4±0.5	3.59	11.5997		4.51444	Rey et al. 2016
SA120	BP/I/1579	Tooth	Titanosuchidae	Therapsida	South Africa	Abrahamskraal Fm.	Lower Tapinocephalus AZ	Die Bad	263.9±1.2	-56.4±0.5	2.74	11.515		2.35535	Rey et al. 2016
SA121	BP/I/1579	Bone	Titanosuchidae	Therapsida	South Africa	Abrahamskraal Fm.	Lower Tapinocephalus AZ	Die Bad	263.9±1.2	-56.4±0.5	3.54	11.181		4.77338	Rey et al. 2016
SA113	BP/I/1576	Bone	Criocephalosaurus	Therapsida	South Africa	Abrahamskraal Fm.	Lower Tapinocephalus AZ	Die Bad	263.9±1.2	-56.4±0.5	2.14	11.5247		2.50026	Rey et al. 2016
SA114	BP/I/1581	Bone	Struthiocephalus	Therapsida	South Africa	Abrahamskraal Fm.	Lower Tapinocephalus AZ	Die Bad	263.9±1.2	-56.4±0.5	2.2	14.701	*	18.0483	Rey et al. 2016
SA112	BP/I/1371	Bone	Glanosuchus	Therapsida	South Africa	Abrahamskraal Fm.	Lower Tapinocephalus AZ	Die Bad	263.9±1.2	-56.4±0.5	2.51	11.4726		5.29586	Rey et al. 2016
